# Supplementary material for: Regulation of Antimicrobial Effect of Hemicyanine-Based Photosensitizer via Supramolecular Assembly
Source: MDPI journal article supplement (doi:10.3390/nano12172905), 2022-08-24
Supplement: s1 [file s1]

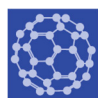

Supplementary material

# Regulation of Antimicrobial Effect of Hemicyanine-based photosensitizer via Supramolecular Assembly

Huanxiang Yuan <sup>1</sup>, Shaochuan Jia <sup>1</sup>, Zelin Li <sup>1</sup>, Jian Liu <sup>2</sup>, Xiaoyu Wang <sup>3,\*</sup> and Ruilian Qi <sup>1,\*</sup>

<sup>1</sup> Department of Chemistry, College of Chemistry and Materials Engineering, Beijing Technology and Business University, Beijing 100048, China

<sup>2</sup> Institute of Chemistry, Chinese Academy of Sciences, Beijing 100090, China

<sup>3</sup> School of Materials Science and Engineering, University of Science and Technology Beijing, Beijing 100083, China

\* Correspondence: wangxy@ustb.edu.cn (X.W.); qiruilian@iccas.ac.cn (R.Q.)

## Materials and Measurements

All chemicals were purchased from the commercial sources (Sigma-Aldrich Shanghai China, and Alfa-Aesar Shanghai China). All organic solvents were obtained from Beijing Chemical Works. UV-Vis absorption spectra were got from a JASCO V-550 spectrophotometer. Fluorescence spectra were measured on a Hitachi F-4500 fluorometer. Three microorganisms (Amp<sup>r</sup> *E. coli*, *S. aureus*, *C. albicans*) were selected as representative strains, which were purchased from China General Microbiological Culture Collection Center. The concentration of microbial suspensions (OD<sub>600</sub>) tested by a UV-Vis spectrophotometer (JASCO V-550) at 600 nm. Bacterial culture related consumables are used after sterilization. Photographs of bright-field and fluorescence-field were taken with a fluorescence microscope (Ti2-U, Nikon, Tokyo, Japan). Zeta potentials were measured on a Nano ZS (ZEN3600) (Malvern, Malvern, UK) system. The <sup>1</sup>H NMR spectra were collected by Bruker Avance III 400 HD nuclear magnetic resonance spectrometer.

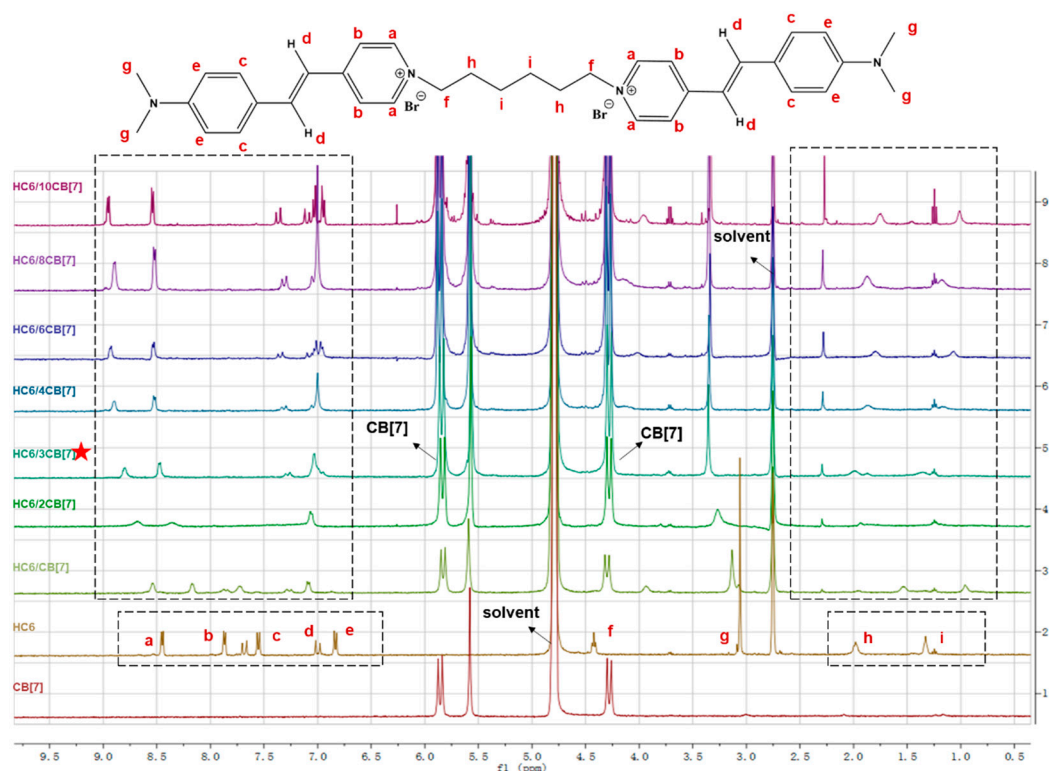

**Figure S1.**  $^1\text{H}$  NMR (400MHz,  $\text{D}_2\text{O}$  with 0.17%  $\text{DMSO-}d_6$ ) spectra of HC6 before and after adding CB[7]. The chemical shifts of protons in aromatic and dimethyl amino groups gradually move to downfield, indicating the assembly complexes HC6/CB[7] form. This is because that the formation of HC6/CB[7] complexes can reduce the aggregation degree of HC6, resulting in the decrease of electron density in aromatic and dimethyl amino groups which lead to a higher ppm value in NMR spectra.

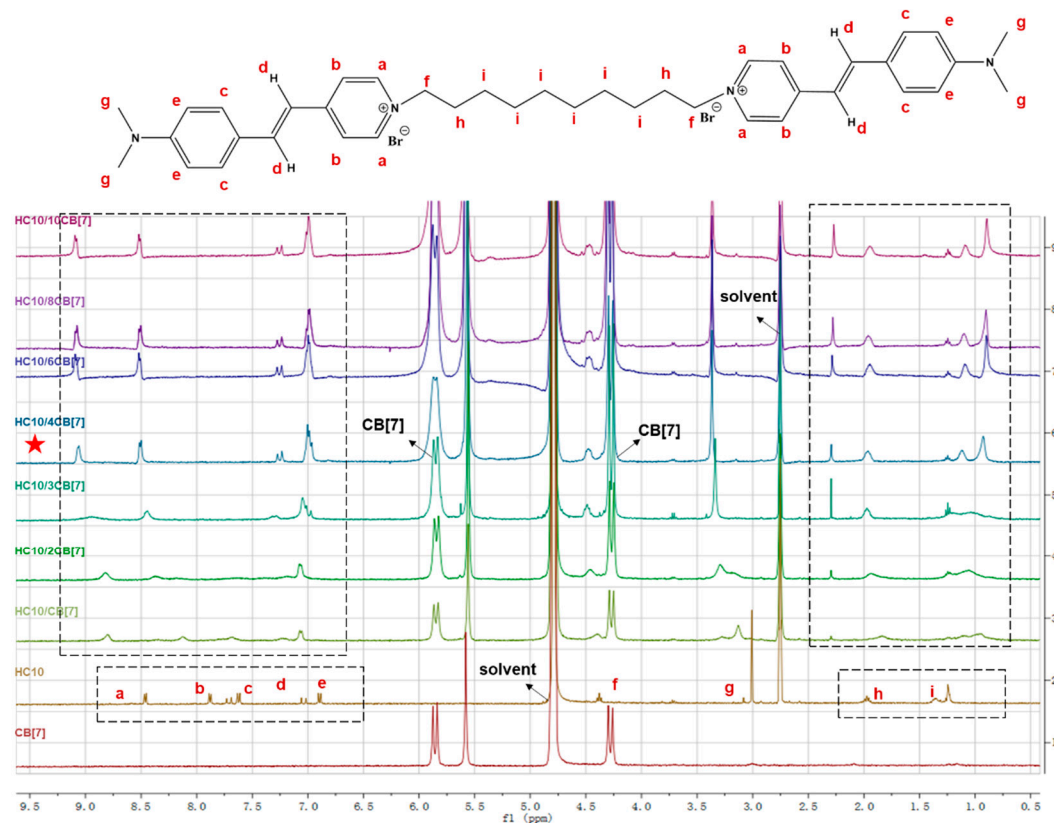

**Figure S2.**  $^1\text{H}$  NMR (400MHz,  $\text{D}_2\text{O}$  with 0.17%  $\text{DMSO-}d_6$ ) spectra of HC10 before and after adding CB[7].

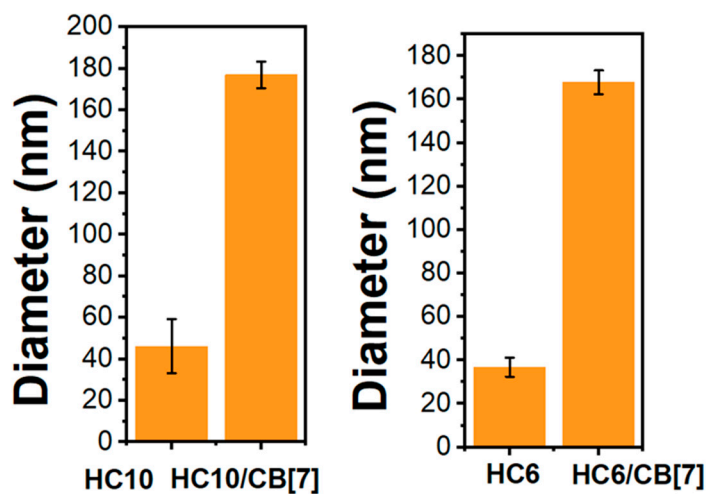

**Figure S3.** Size histograms of HC6 or HC10 and its supramolecular complex HCs/CB[7].

**Table S1.** Zeta potential data of Amp<sup>r</sup> *E. coli*, *S. aureus* and *C. albicans* before and after binding with HCs or supramolecular conjugate HCs/CB[7] complex, respectively.

| Samples                         |            | Zeta potentials ( $\zeta$ , mV) |
|---------------------------------|------------|---------------------------------|
| Amp <sup>r</sup> <i>E. coli</i> | Blank      | $-44.5 \pm 0.2$                 |
|                                 | HC6        | $-41.6 \pm 0.4$                 |
|                                 | HC6/CB[7]  | $-45.4 \pm 0.3$                 |
|                                 | HC10       | $-39.1 \pm 0.5$                 |
|                                 | HC10/CB[7] | $-44.5 \pm 0.1$                 |
| <i>S. aureus</i>                | Blank      | $-26.2 \pm 0.1$                 |
|                                 | HC6        | $-23.4 \pm 0.4$                 |
|                                 | HC6/CB[7]  | $-24.1 \pm 0.1$                 |
|                                 | HC10       | $-19.2 \pm 1.0$                 |
|                                 | HC10/CB[7] | $-26.1 \pm 0.6$                 |
| <i>C. albicans</i>              | Blank      | $-18.0 \pm 0.1$                 |
|                                 | HC6        | $-17.1 \pm 0.3$                 |
|                                 | HC6/CB[7]  | $-17.3 \pm 0.3$                 |
|                                 | HC10       | $-18.2 \pm 0.9$                 |
|                                 | HC10/CB[7] | $-18.3 \pm 1.1$                 |

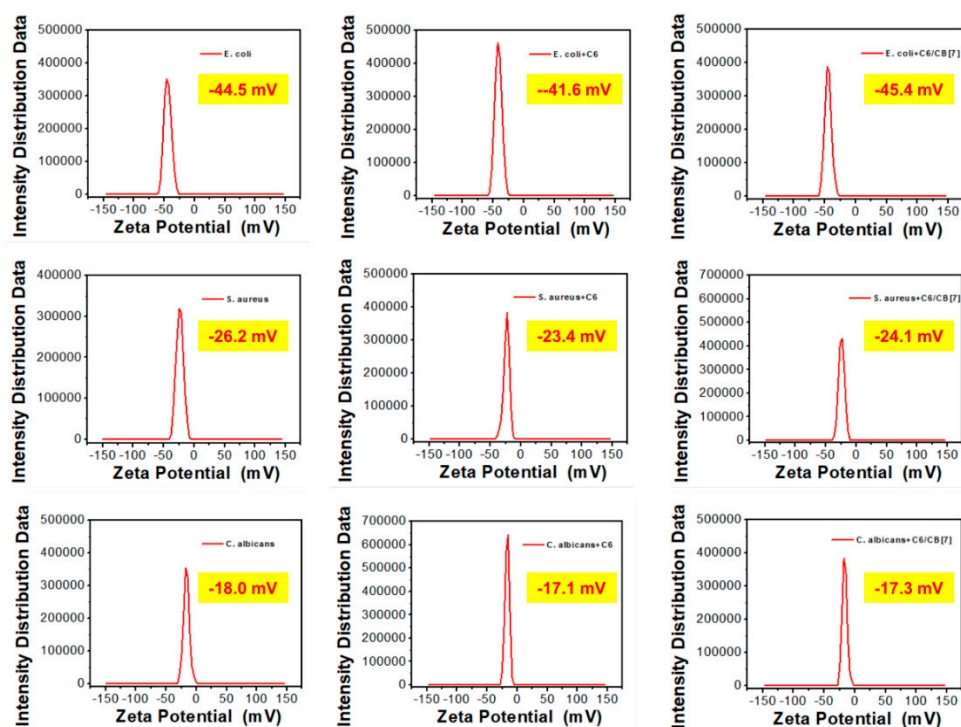

**Figure S4.** Zeta potentials of the three pathogens before and after binding with HC6 or supramolecular conjugate complex HC6/CB[7].

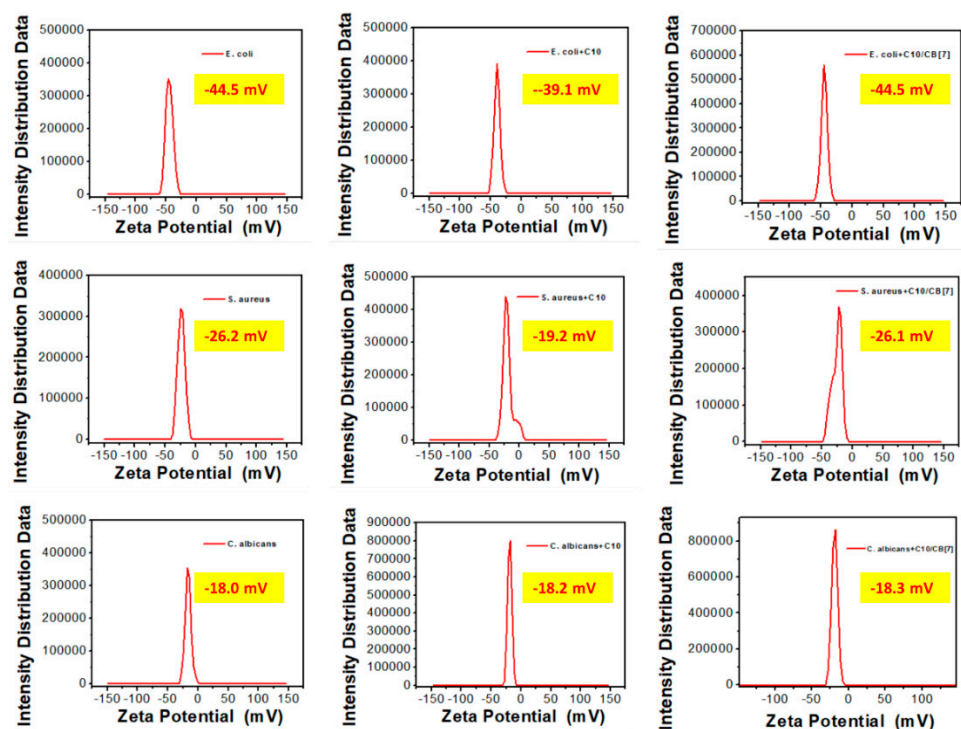

**Figure S5.** Zeta potentials of the three pathogens before and after binding with HC10 or supramolecular conjugate complex HC10/CB[7].

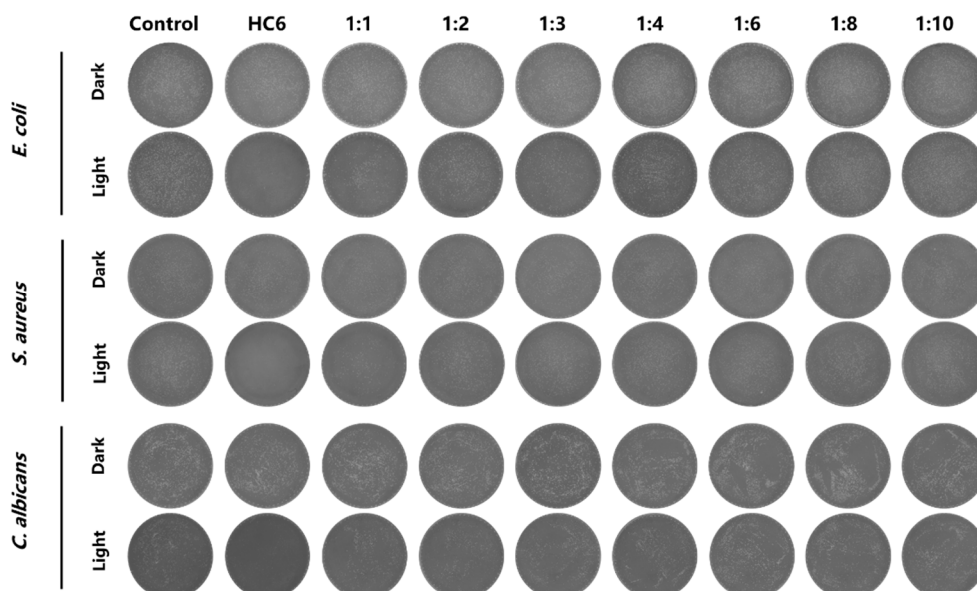

**Figure S6.** Plate photographs of *E. coli*, *S. aureus* and *C. albicans* acting with HC6 and its supramolecular assemblers in different proportions. [HC6] = 25  $\mu$ M, [CB[7]] = 0, 25, 50, 75, 100, 150, 200, 250  $\mu$ M.

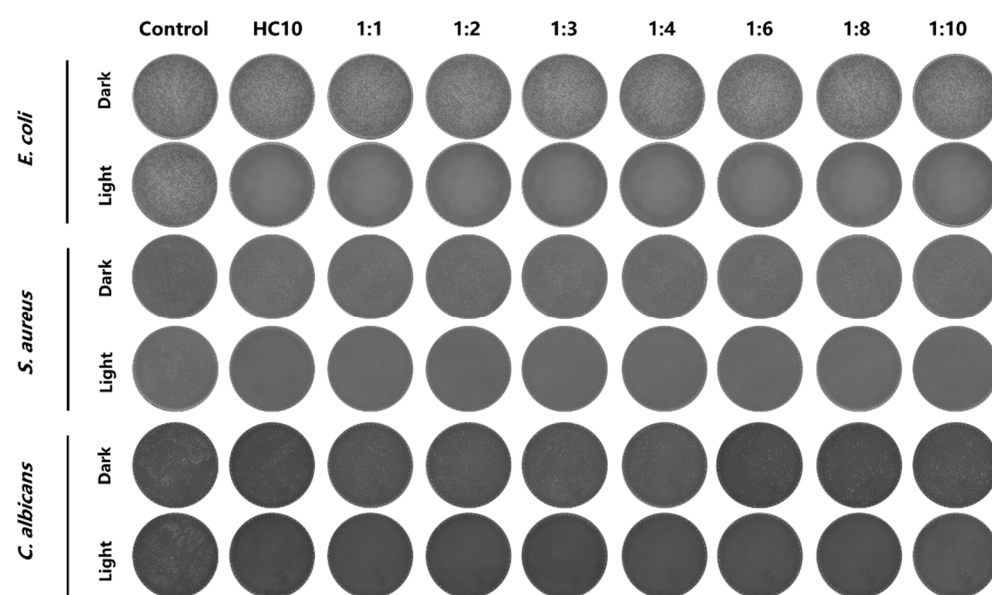

**Figure S7.** Plate photographs of *E. coli*, *S. aureus* and *C. albicans* acting with HC10 and its supramolecular assemblers in different proportions. [HC10] = 25  $\mu$ M, [CB[7]] = 0, 25, 50, 75, 100, 150, 200, 250  $\mu$ M.

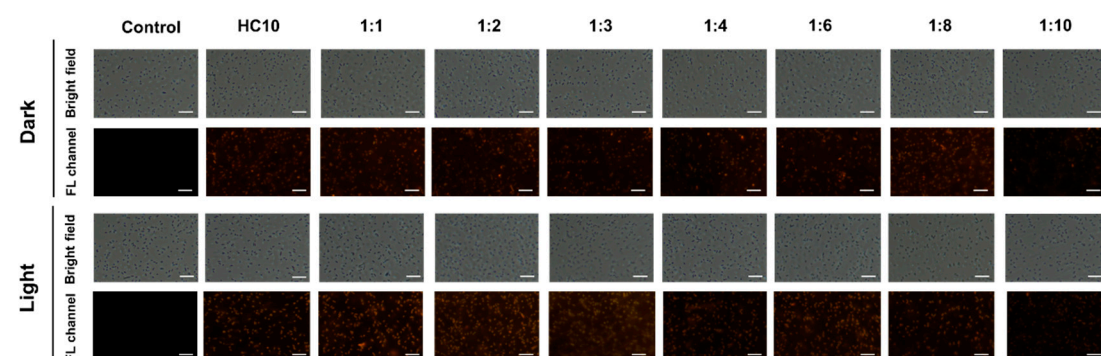

**Figure S8.** Fluorescence microscope images of *E. coli* before and after binding with HC10 and HC10/CB[7] in different proportions under light (65 mW/cm<sup>2</sup>) and darkness, [HC10] = 25  $\mu$ M, [CB[7]] = 0, 25, 50, 75, 100, 150, 200, 250  $\mu$ M, the scale is 20  $\mu$ m.



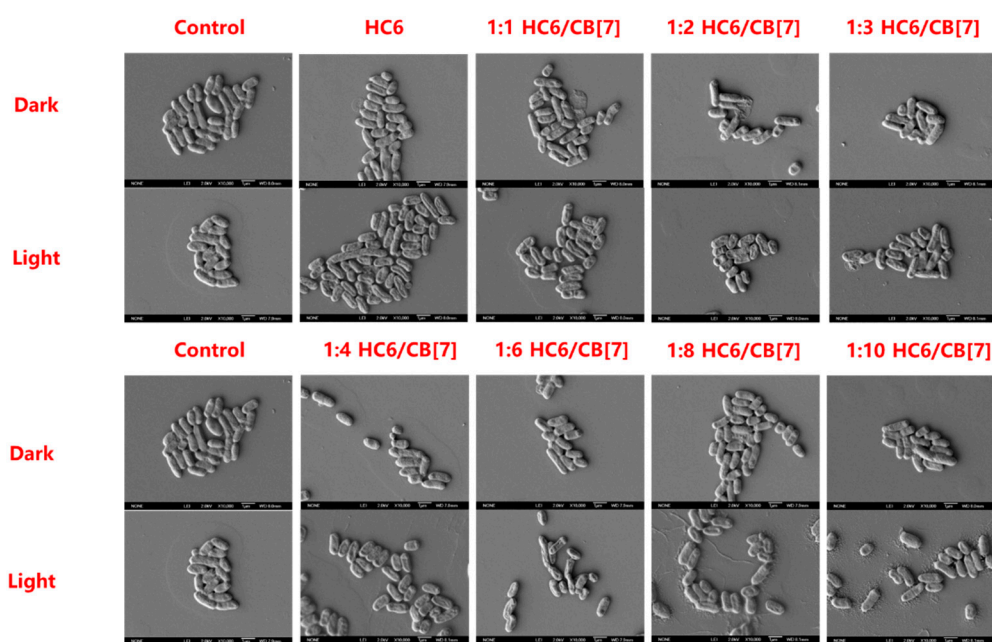

**Figure S9.** SEM images of Amp<sup>r</sup> *E. coli* with HC6 and HC6/CB[7] before and after the interaction under dark or light (65 mW/cm<sup>2</sup>), the scale is 1 μm.
